# Supplementary material for: Auxiliary domains of the HrpB bacterial DExH-box helicase shape its RNA preferences
Source: PubMed Central journal article supplement — RNA Biol. 2020 Feb 12;17(5):637–50. doi: 10.1080/15476286.2020.1720376 (PMC7237152; doi:10.1080/15476286.2020.1720376), 2020-02-12
Supplement: krnb-17-05-1720376-s001.pdf [file krnb-17-05-1720376-s001.pdf]

1 **Supplementary Information**

2

3 **RNA recognition of the HrpB bacterial DExH-box helicase is mediated by its additional**  
4 **domains**

5 Stéphane Hausmann<sup>1</sup>, Johan Geiser<sup>1</sup>, Oscar Vadas<sup>1</sup>, Verena Ducret<sup>2</sup>, Karl Perron<sup>2</sup> and  
6 Martina Valentini<sup>1\*</sup>

7

8 **Inventory of Supplementary information**

9

10 **Supplementary Figure 1.** Sequence conservation among bacterial HrpB proteins.

11 **Supplementary Figure 2.** Sequence alignment of characterized DExH-box helicases.

12 **Supplementary Figure 3.** His<sub>10</sub>Smt3 cleavage, gel filtration and ATPase activity.

13 **Supplementary Figure 4.** Deoxyribonucleotide specificity.

14 **Supplementary Figure 5.** HrpB ATPase metal, pH and salt dependence.

15 **Supplementary Figure 6.** Glycerol gradient sedimentation of HrpB.

16 **Supplementary Figure 7.** Workflow of the HDX-MS experiments.

17 **Supplementary Figure 8.** Peptide map of HrpB showing peptides that were analysed by  
18 HDX-MS.

19 **Supplementary Figure 9.** Deuterium uptake plots (% deuteration  $\pm$  standard deviation) over  
20 time of flaking regions represented in Figure 5.

21 **Supplementary Figure 10.** *Pa*HrpB model.

22 **Table S1.** Strains and plasmids used in this study.

23 **Table S2.** List of primers used in this study.

24 **Table S3.** HDX-MS experimental details.

25 **Table S4:** HDX-MS data (see Excel file).





35 **Supplementary Figure 2. Sequence alignment of characterized DExH-box helicases.**  
36 Strictly conserved residues are in white on a black background while partially conserved  
37 residues are boxed on a grey background. Sequence region corresponding to the RecA-like,  
38 WH, HB, and OB domains are highlighted by boxes coloured as in Figure 1. Pa, *P. aeruginosa*;  
39 Ec, *E. coli*, Ct, *Chaetomium thermophilum*; Hs, *Homo sapiens*; Sc, *Saccharomyces cerevisiae*;  
40 Mm, *Mus musculus*; Dm, *Drosophila melanogaster*.

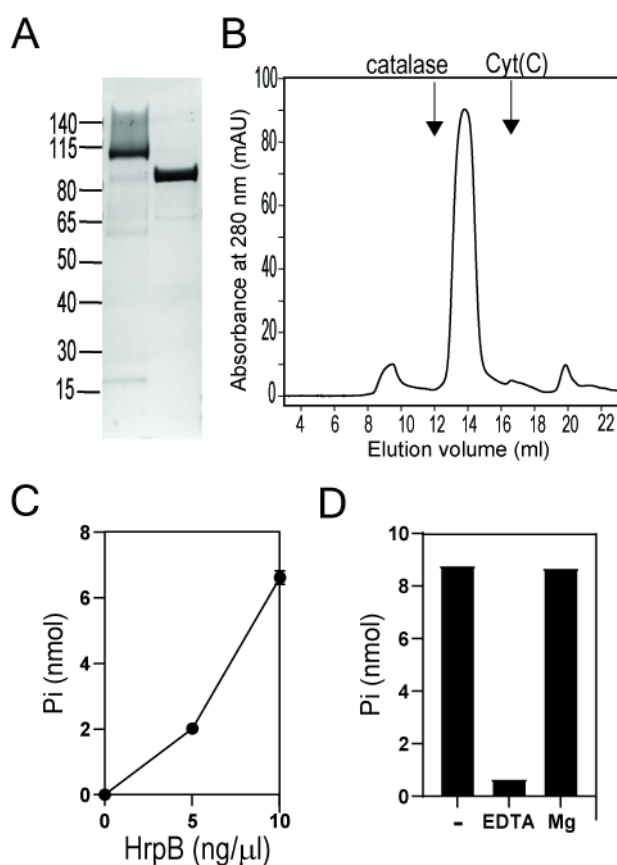

41

42 **Supplementary Figure 3. His<sub>10</sub>Smt3 cleavage, gel filtration and ATPase activity.** (A) 1 mg  
 43 of His<sub>10</sub>Smt3-HrpB was digested with 12.5 µg of ULP1 (home-made Smt3-specific protease)  
 44 in buffer A (50 mM Tris-HCl, pH 8.0, 200 mM NaCl, 10% glycerol) for 2 hrs at 4°C. Coomassie  
 45 stained SDS page gel of the undigested and digested HrpB (1 µg) is shown. The positions  
 46 and sizes (in kDa) of marker proteins are indicated on the left. (B) 1 mg of digested HrpB was  
 47 purified further through a Superdex-200 (S200; Akta) column equilibrated in Buffer A  
 48 containing 1mM EDTA. Size-exclusion chromatography elution profile (ml) is shown. (C)  
 49 ATPase activity of S200-purified untagged HrpB. Reaction mixtures (15 µl) containing 50 mM  
 50 Tris-HCl (pH 8.0), 1 mM DTT, 2 mM MgCl<sub>2</sub>, 1 mM [ $\gamma$ -<sup>32</sup>P] ATP, 250 ng/µl Poly(A) and untagged  
 51 HrpB were incubated for 15 min at 37 °C. Pi release was plotted as a function of input protein.  
 52 Data are the average  $\pm$  SEMs from three independent experiments. (D) Metal dependence.  
 53 Reaction mixtures (15 µl) containing 50 mM Tris-HCl (pH 8.0), 1 mM DTT, 1 mM [ $\gamma$ -<sup>32</sup>P] ATP,  
 54 250 ng/µl Poly(A), 10 ng/µl S200-purified untagged HrpB, and either No divalent cation (-), 2  
 55 mM of EDTA or 2 mM of MgCl<sub>2</sub> were incubated for 15 min at 37 °C. The extend of ATP  
 56 hydrolysis is plotted.

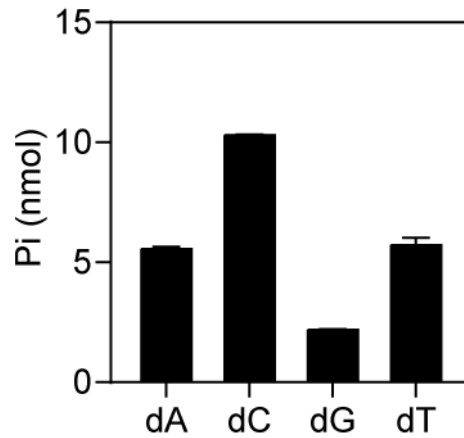

57

58 **Supplementary Figure 4. Deoxyribonucleotide specificity.** Reaction mixtures (15  $\mu$ l)  
59 containing 50 mM Tris-HCl (pH 8.0), 1 mM DTT, 2 mM  $MgCl_2$ , 250 ng/ $\mu$ l Poly(A), 5 ng/ $\mu$ l WT  
60 HrpB (or no added enzyme) and 1 mM deoxyribonucleotide triphosphate as specified were  
61 incubated for 15 min at 37 °C. The reactions were quenched by adding 1 ml of malachite green  
62 reagent. Phosphate release was determined by measuring A620 and extrapolating the value  
63 to a phosphate standard curve. Data are the average  $\pm$  SEMs from three independent  
64 experiments.

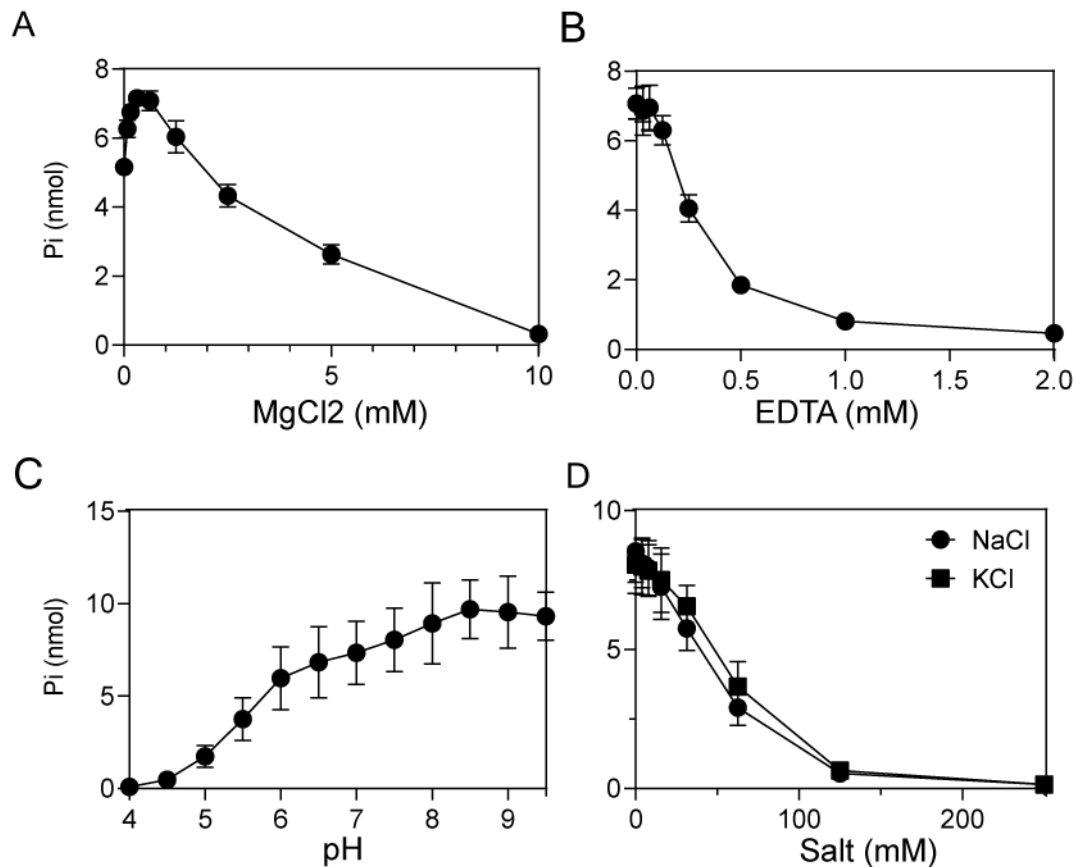

65

66 **Supplementary Figure 5. HrpB ATPase metal, pH and salt dependence.** (A) Magnesium  
67 titration. Reaction mixtures (15  $\mu$ l) containing 50 mM Tris-HCl (pH 8.0), 1 mM DTT, 1 mM [ $\gamma$ -  
68 <sup>32</sup>P] ATP, 250 ng/ $\mu$ l Poly(A), 10 ng/ $\mu$ l WT HrpB, and MgCl<sub>2</sub> as specified were incubated for 15  
69 min at 37 °C. Pi release was plotted as a function of magnesium concentration. (B) EDTA  
70 titration. Reaction mixtures (15  $\mu$ l) containing 50 mM Tris-HCl (pH 8.0), 1 mM DTT, 2 mM  
71 MgCl<sub>2</sub>, 250 ng/ $\mu$ l Poly(A), 10 ng/ $\mu$ l WT HrpB and EDTA as specified were incubated for 15 min  
72 at 37 °C. Pi release was plotted as a function of EDTA concentration. (C) pH dependence.  
73 Reaction mixtures containing either 50 mM Tris acetate (pH 5.0 to 7.0), or Tris-HCl (pH 7.5 to  
74 9.5), 1 mM DTT, 2 mM MgCl<sub>2</sub>, 1 mM [ $\gamma$ -<sup>32</sup>P] ATP, 250 ng/ $\mu$ l Poly(A), and 10 ng/ $\mu$ l WT HrpB,  
75 were incubated for 15 min at 37 °C. Pi release was plotted as a function of pH. (D) Inhibition  
76 of HrpB ATPase by salt. Reaction mixtures (15  $\mu$ l) containing 50 mM Tris-HCl (pH 8.0), 1 mM  
77 DTT, 2 mM MgCl<sub>2</sub>, 250 ng/ $\mu$ l Poly(A), 10 ng/ $\mu$ l WT HrpB, and either NaCl or KCl as specified  
78 were incubated for 15 min at 37 °C. Pi release was plotted as a function of salt concentration.  
79 Data are the average  $\pm$  SEMs from three independent experiments.

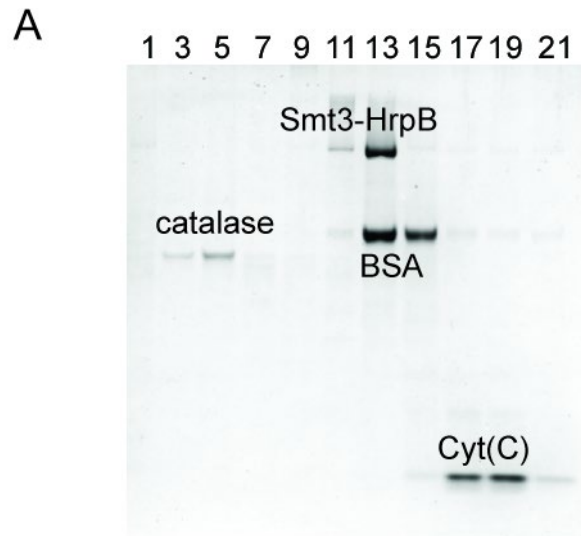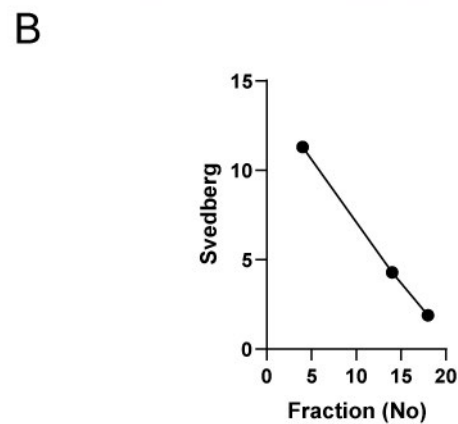

80

81 **Supplementary Figure 6. Glycerol gradient sedimentation of HrpB.** His<sub>10</sub>Smt3-HrpB was  
 82 sedimented in a glycerol gradient. Briefly, an aliquot (50 µg) of the nickel-agarose preparation  
 83 of His<sub>10</sub>Smt3-HrpB was mixed with catalase (40 µg), BSA (50 µg), and cytochrome c (50 µg).  
 84 The mixture was applied to a 4.8-ml 15–30% glycerol gradient containing 50 mM Tris-HCl (pH  
 85 8.0), 100 mM NaCl, 1 mM EDTA, 2 mM DTT, and 0.05 % Triton-X100. The gradient was  
 86 centrifuged in a SW50 rotor at 48,000 rpm for 19 h at 4 °C. Fractions (0.2 ml) were collected  
 87 from the bottom of the tube. Aliquots (20 µl) of odd-numbered gradient fractions were analyzed  
 88 by SDS-PAGE. The Coomassie Blue-stained gel is shown in panel A. (B) A plot of the S  
 89 (Svedberg) values of the three standards versus fraction number is shown. This graphic  
 90 allowed us to calculate an S value of 5.16 for His<sub>10</sub>Smt3-HrpB.



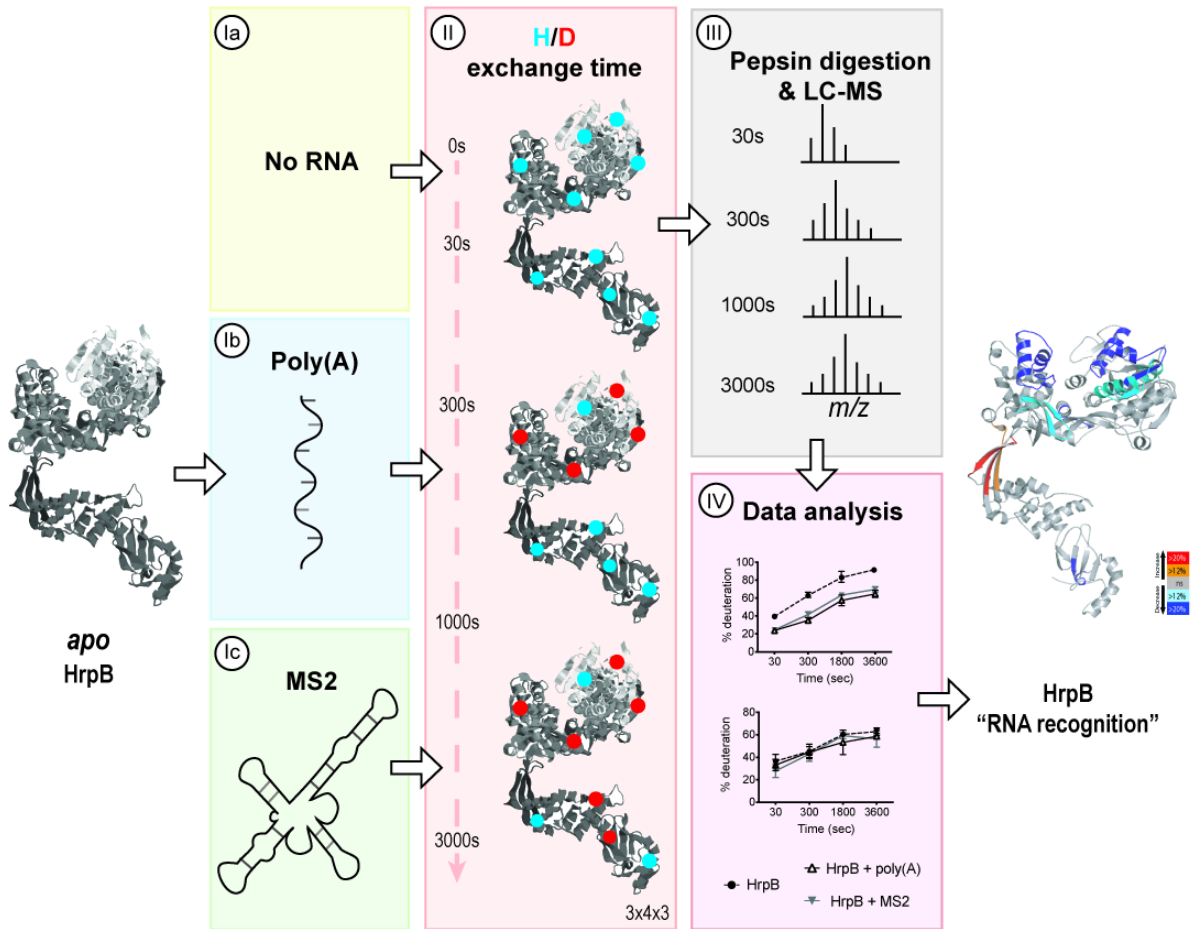

91

92 **Supplementary Figure 7. Workflow of the HDX-MS experiments.** HDX profile of HrpB was  
 93 studied on three different conditions, e.g. *apo* protein (Ia), protein + poly(A) (Ib), and protein +  
 94 MS2 RNA (Ic). For every condition, the sample was incubated with deuterated solvent and the  
 95 reaction was terminated (pH 2.4, 0°C) after 30, 300, 1000 and 3000 seconds (II). Samples  
 96 were digested under quenching conditions by pepsin and peptides were separated by liquid  
 97 chromatography followed by mass spectrometry to identify and characterized deuterium-  
 98 incorporated peptides (III). Every condition has been performed in triplicates (3 conditions x 4  
 99 timepoints x 3 replicates). Finally, data analysis included statistical tests and graphical  
 100 representation of the data (see Figure 5).

```

1   5   10  15  20  25  30  35  40  45  50  55  60  65  70  75  80  85  90
MGHHH HHHHH HSSSG HIEGR HMAAM DDSEV HQEAK PEVKP EVKPF THINL KVS DG SSEIF FKIKK TTPLR RLMEA FAKRQ GKEMD SLRFL
91  95  100 105 110 115 120 125 130 135 140 145 150 155 160 165 170 175 180
YDGIR IQADQ TPEDL DMEDN DII EA HREQI GGSEF ELRRQ ASISL PIDAV VPALR QALGA QHQA V LEAPP GAGKT TRVPL ALLDE PMLAG
181 185 190 195 200 205 210 215 220 225 230 235 240 245 250 255 260 265 270
RILM LEPRR LAARA AAERL AAELG EKVGE TVGYR IRLES RVGPK TRIEV VTEGI LARRL DDP A LDG VG LVIFD EFHER SLDDA LALAL
271 275 280 285 290 295 300 305 310 315 320 325 330 335 340 345 350 355 360
TLNGR ELLRD EPFLK VLVMS ATLEG ERLAA LLGEA FVVR S EGRMF FVDIR WGRPA QFGEF IEFVY QQAVL QALAE ESGSV LVFLF GQAEI
361 365 370 375 380 385 390 395 400 405 410 415 420 425 430 435 440 445 450
RRVHE GLREA LGGRF EVLLC PLHGE LDLLA QRAAI EPASR GTRKV VLATN IAETS LTIDG VRVVI DAGLA RVPRF DPGSG HTRLE TQRIS
451 455 460 465 470 475 480 485 490 495 500 505 510 515 520 525 530 535 540
RASAT QRAGR AGRLE PGVCI RLWSE SQHEQ LPAYG TAEIL QADLA GLALQ LARWG VAPRE LAWLD APPAA AYAQA RELLE RLGLA NARGA
541 545 550 555 560 565 570 575 580 585 590 595 600 605 610 615 620 625 630
LSAHG QAMAE LPTHP KIAHL LLRGQ ALGLG ELACD VAALL GERDI QRGGS ADLHS RLALL AGEAR TGASR GAVQR ARQLA RQFRG YLRGA
631 635 640 645 650 655 660 665 670 675 680 685 690 695 700 705 710 715 720
ASEAV VDFGH PRMLG CLLAF AYPDR IARQR RAGGG DYRLA NGRAA QFGEF DSLMK QPWL V IADLG SRQGQ REERI YLAAB LDPRL FDTVL
721 725 730 735 740 745 750 755 760 765 770 775 780 785 790 795 800 805 810
AEQVS QRDEL QWDER EGVLR AERQR RVGEL VLSSE ALPQL DEARR SQALL GLVRR KGLEL LPWTF ELRQW QARIQ LLRRL DLEDK GESEW
811 815 820 825 830 835 840 845 850 855 860 865 870 875 880 885 890 895 900
PDVSD AALLE RLEEW LPAYL GKVTR LAHFA NLDLA SILAG LLPWP LPQRL DEWAF KTELV PGGSR IRLDI SETPF ILAVR LQELF GLGDT
901 905 910 915 920 925 930 935 940 945 950 955 960 965
PRIAQ GRLAV KLHLL SFAHR PVQVT QDLAN FWRST TAEVR KDLRQ RYFKH YWPD D PLVAE ATARA KPRK

```

101

102 **Supplementary Figure 8. Peptide map of HrpB showing peptides that were analysed by**  
103 **HDX-MS. Coverage was 96 %. Note that the ORF of HrpB start at Ile133**

104

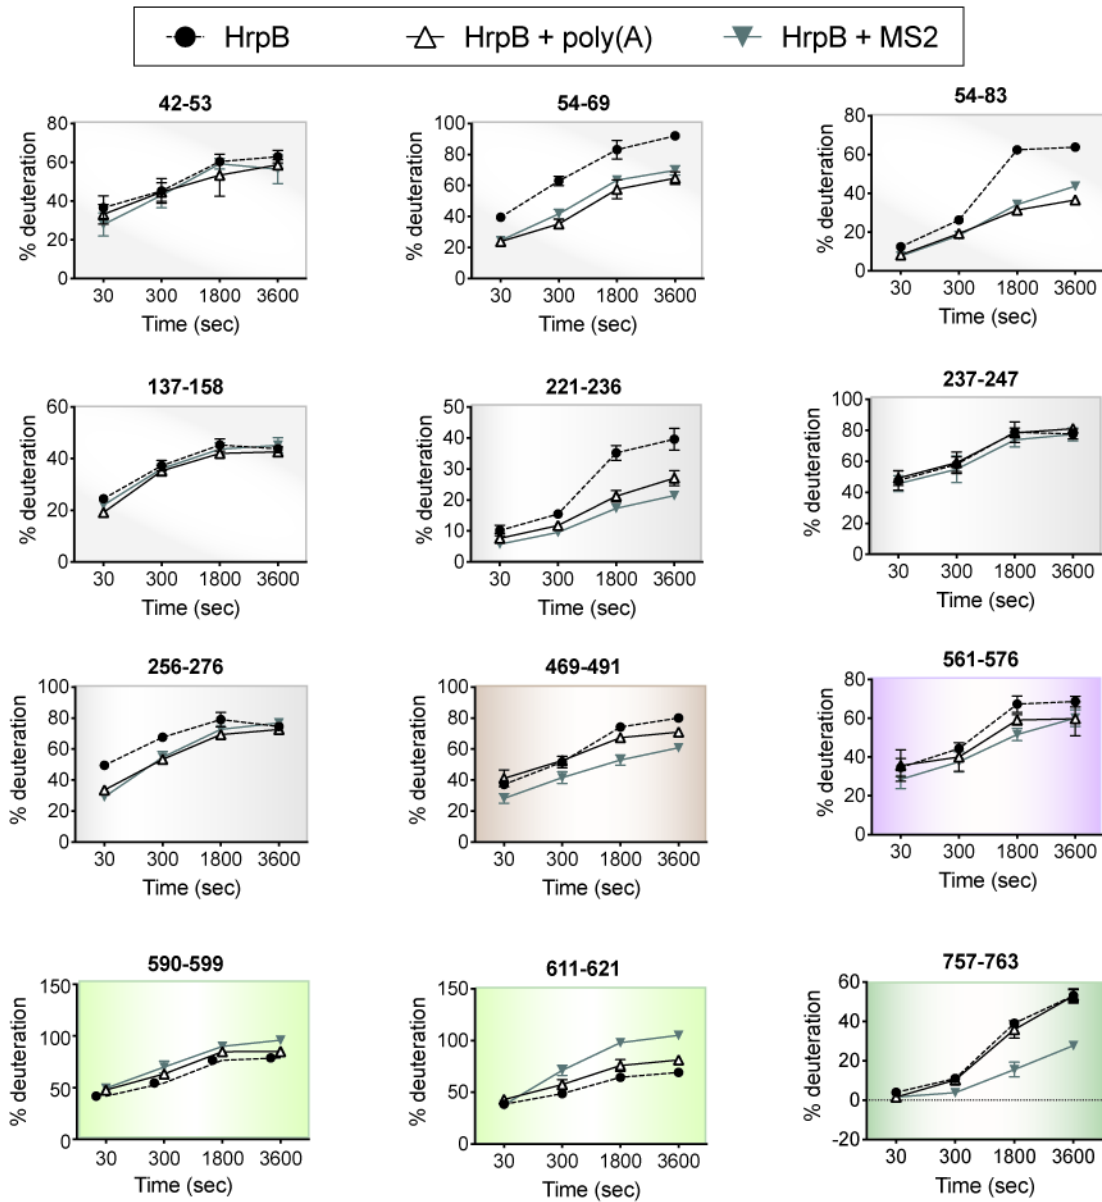

105

106 **Supplementary Figure 9. Deuterium uptake plots (% deuterium  $\pm$  standard deviation)**  
 107 **over time of flaking regions represented in Figure 5.** Residue number is indicated on top  
 108 of each graph. Graph background is coloured according to the domain to which they belong,  
 109 according to Figure 1.

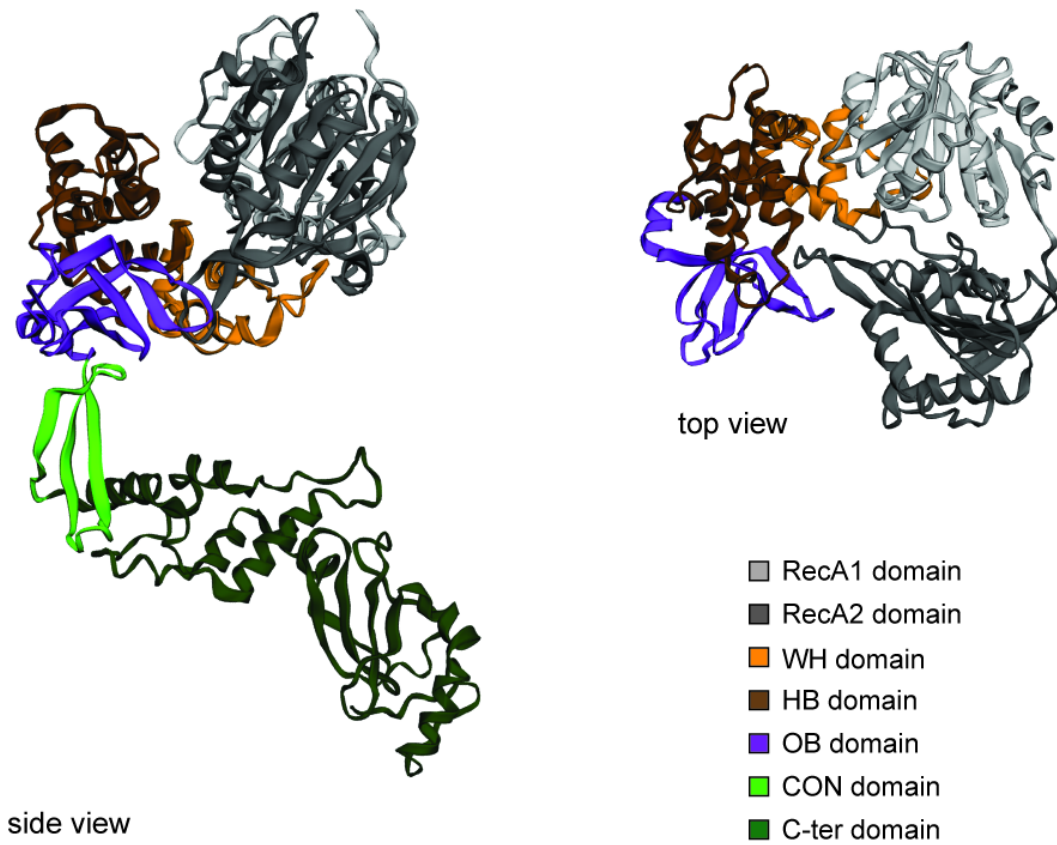

110

111 **Supplementary Figure 10. *PaHrpB* model.** Side and top view of *P. aeruginosa* HrpB  
 112 structure modelled based on the *E. coli* HrpB structure (PDB code: 6EUD and 6HEG).  
 113 Sequence region corresponding to the RecA-like, WH, HB, and OB domains are highlighted  
 114 by boxes coloured as in Figure 1.

115 **Table S1. Strains and plasmids used in this study.**

| Strains                          | Genotype/relevant characteristics                                                                                                                                                         | Source                 |
|----------------------------------|-------------------------------------------------------------------------------------------------------------------------------------------------------------------------------------------|------------------------|
| <i>E. coli</i>                   |                                                                                                                                                                                           |                        |
| Rosetta (DE3)<br>DH5α            | <i>F- ompT hsdSB(rB- mB-) gal dcm</i> (DE3) pRARE (Cm <sup>R</sup> )<br><i>recA1 endA1 hsdR17 supE44 thi-1 gyrA96 relA1 Δ(lacZYA-argF)U169 [Φ80dlacZM15]F<sup>-</sup> Nal<sup>r</sup></i> | Novagen<br>(1)         |
| HB101                            | <i>proA2 hsdS20(rB<sup>-</sup> mB<sup>-</sup>) recA13 ara-14 lacYI galK2 rpsL20 supE44 xyl-5 mtl-1 F<sup>-</sup></i>                                                                      | (1)                    |
| <i>P. aeruginosa</i>             |                                                                                                                                                                                           |                        |
| PAO1                             | Wild-type                                                                                                                                                                                 | (2)                    |
| PAO1Δ <i>hrpB</i>                | PAO1 with a <i>hrpB</i> (PA3961) deletion                                                                                                                                                 | This study             |
| Plasmids                         |                                                                                                                                                                                           |                        |
| pET28b-10xHis-Smt3               | Broad host range vector for expression of N-terminal 10xHis-Smt3-tag proteins, Kan <sup>R</sup>                                                                                           | (3) and lab collection |
| pME3087                          | Suicide vector for allelic replacement; Tc <sup>r</sup> ; ColE1 replicon                                                                                                                  | (4)                    |
| pME3087_Δ <i>hrpB</i>            | Suicide construct for the deletion of <i>hrpB</i> (aa 50 to 943)                                                                                                                          | This study             |
| pSmt3_HrpB                       | Vector for expression of 10xHis-Smt3-HrpB                                                                                                                                                 | This study             |
| pSmt3_HrpB <sub>K33A</sub>       | Vector for expression of 10xHis-Smt3-HrpB <sub>K33A</sub>                                                                                                                                 | This study             |
| pSmt3_HrpB <sub>1-365</sub>      | Vector for expression of 10xHis-Smt3-HrpB <sub>1-365</sub>                                                                                                                                | This study             |
| pSmt3_HrpB <sub>K33A,1-365</sub> | Vector for expression of 10xHis-Smt3-HrpB <sub>K33A,1-365</sub>                                                                                                                           | This study             |
| pSmt3_HrpB <sub>1-628</sub>      | Vector for expression of 10xHis-Smt3-HrpB <sub>1-628</sub>                                                                                                                                | This study             |
| pSmt3_HrpB <sub>1-702</sub>      | Vector for expression of 10xHis-Smt3-HrpB <sub>1-702</sub>                                                                                                                                | This study             |
| pSmt3_HrpB <sub>1-390</sub>      | Vector for expression of 10xHis-Smt3-HrpB <sub>1-390</sub>                                                                                                                                | This study             |
| pSmt3_HrpB <sub>1-500</sub>      | Vector for expression of 10xHis-Smt3-HrpB <sub>1-500</sub>                                                                                                                                | This study             |
| pSmt3_HrpB <sub>1-539</sub>      | Vector for expression of 10xHis-Smt3-HrpB <sub>1-539</sub>                                                                                                                                | This study             |
| pSmt3_HrpB <sub>1-589</sub>      | Vector for expression of 10xHis-Smt3-HrpB <sub>1-589</sub>                                                                                                                                | This study             |
| pRK2013                          | Helper plasmid; Tra <sup>+</sup> Km <sup>r</sup>                                                                                                                                          | (1)                    |

117 **Table S2. List of primers used in this study.**

| Name              | Sequence <sup>a</sup> (5' → 3')         | Restriction site <sup>#</sup> |
|-------------------|-----------------------------------------|-------------------------------|
| pHrpB-Smt3.1      | <u>CCAAGCTT</u> CAATTTCCCTACCCATCGACG   | HindIII                       |
| pHrpB.rev         | CG <u>CTCGAG</u> CTACTTGCGTGGCTTGGCCCGG | XhoI                          |
| pHrpBK33A.fw      | CCGGGTGCCGGCGCGACCACCCGGGTG             |                               |
| pHrpBK33A.rev     | CACCCGGGTGGTCGCGCCGGCACCCGG             |                               |
| pHrpBA390STOP.fw  | CCCGCGGCGGCCTAGGCCAGGCCCGCGAG           |                               |
| pHrpBA390STOP.rev | CTCGCGGGCCTGGGCCTAGGCCCGCCGGG           |                               |
| pHrpBV702STOP.fw  | CTATCTCGGCAAGGTCTAGCGCCTGGCTCACTT<br>C  |                               |
| pHrpBV702STOP.rev | GAAGTGAGCCAGGCGCTAGACCTTGCCGAGAT<br>AG  |                               |
| pHrpBA500Stop.fw  | CTGCGCGGCGCCGCCTAGGAGGCGGTCTGTCG<br>ATC |                               |
| pHrpBA500Stop.rev | GATCGACGACCGCCTCCTAGGCGGCGCCGCG<br>CAG  |                               |
| pHrpBG365Stop.fw  | GATCTGGCCGGGTAGGCCCTGCAACTG             |                               |
| pHrpBG365Stop.rev | CAGTTGCAGGGCCTACCCGGCCAGATC             |                               |
| pHrpBA539Stop.fw  | CTACCGGCTGGCCTAGGGACGCGCTGCG            |                               |
| pHrpBA539Stop.rev | CGCAGCGCGTCCCTAGGCCAGCCGGTAG            |                               |
| pHrpBA589Stop.fw  | GATACGGTCCTGGCGTAGCAGGTCAGCCAG          |                               |
| pHrpBA589Stop.rev | CTGGCTGACCTGCTACGCCAGGACCGTATC          |                               |
| pHrpBA628Stop.fw  | GCGCTACCCGGCTAGGACGAAGCGGCG             |                               |
| pHrpBA628Stop.rev | CGCCGCTTCGTCTAGCCGGGTAGCGC              |                               |
| pHrpB.1           | <u>GCCGGTACCGGCG</u> AAAAGGTCGGCGAGAC   |                               |
| pHrpB.2           | <u>GCCCTGCAGAT</u> GAACTCGCCGGGTTGCGC   |                               |
| pHrpB.3           | <u>GCCCTGCAGG</u> GCAGTGAAGCTGCACCTGC   |                               |
| pHrpB.4           | <u>GCCAAGCTT</u> AACGCTGGTATCGCCTCTAC   |                               |
| rpoD.fw           | GGGCGAAGAAGGAAATGGTC                    |                               |
| rpoD.rev          | CAGGTGGCGTAGGTGGAGAA                    |                               |

118 <sup>#</sup>restriction sites underlined

119 **Table S3. HDX-MS experimental details.**

| <b>Description</b>                                                   | <b>HrpB apo</b>                                                                                              | <b>HrpB + poly(A) RNA</b> | <b>HrpB + MS2 RNA</b> |
|----------------------------------------------------------------------|--------------------------------------------------------------------------------------------------------------|---------------------------|-----------------------|
| <b>Reaction volume</b>                                               | 50 ul                                                                                                        | 50 ul                     | 50 ul                 |
| <b>% D2O in the reaction</b>                                         | 79%                                                                                                          | 79%                       | 79%                   |
| <b>Temperature</b>                                                   | 0°C                                                                                                          | 0°C                       | 0°C                   |
| <b>Time course (sec)</b>                                             | 30, 300, 1800, 3600                                                                                          | 30, 300, 1800, 3600       | 30, 300, 1800, 3600   |
| <b>Control samples</b>                                               | Non-deuterated (ND) and fully deuterated (FD) HrpB protein                                                   |                           |                       |
| <b>Quench buffer</b>                                                 | 3 M Gdn-HCl/ 0.1 M NaH <sub>2</sub> PO <sub>4</sub> pH 2.5/ 1 % Formic Acid                                  |                           |                       |
| <b>Quench buffer volume</b>                                          | 20 ul                                                                                                        | 20 ul                     | 20 ul                 |
| <b>Number of peptides analyzed</b>                                   | 189                                                                                                          | 189                       | 189                   |
| <b>Sequence coverage</b>                                             | 96%                                                                                                          | 96%                       | 96%                   |
| <b>Replicates (for each incubation time)</b>                         | 3, 3, 3, 3                                                                                                   | 3, 3, 3, 3                | 3, 3, 3, 3            |
| <b>Standard deviation average (all time points, Nb of Deuterons)</b> | 0.14                                                                                                         | 0.16                      | 0.15                  |
| <b>Criteria for HDX rate difference</b>                              | Difference of HDX level at a given timepoint is > 12 % and > 0.6 Da and p values of student t-test is < 0.05 |                           |                       |

120

121 **Table S4: HDX-MS data (see Excel file).**

122

123 **Additional references**

- 124 1. Sambrook, J., E. F. Fritsch, and T. Maniatis. (1989) *Molecular cloning: a laboratory manual*.  
125 2nd ed. ed, 2nd ed. Cold Spring Harbor Laboratory Press. Cold Spring Harbor, NY.
- 126 2. Holloway, B.W., Krishnapillai, V. and Morgan, A.F. (1979) Chromosomal genetics of  
127 *Pseudomonas*. *Microbiological reviews*, **43**, 73-102.
- 128 3. Mossessova, E. and Lima, C.D. (2000) Ulp1-SUMO crystal structure and genetic analysis reveal  
129 conserved interactions and a regulatory element essential for cell growth in yeast. *Molecular*  
130 *cell*, **5**, 865-876.
- 131 4. Voisard, C., Bull, C. T., Keel, C. , Laville, J. , Maurhofer, M. , Schnider, U. , Défago, G. and Haas,  
132 D. (1994), *Molecular Ecology of Rhizosphere Microorganisms*, pp. 67-89.

133
